# Intraplaque Stretch in Carotid Atherosclerotic Plaque – an Effective Biomechanical Predictor for Subsequent Cerebrovascular Ischemic Events

Zhongzhao Teng<sup>1,2,\*</sup>, Umar Sadat<sup>3</sup>, Wenkai Wang<sup>1</sup>, Nasim S. Bahaei<sup>1</sup>, Shengyong Chen<sup>4</sup>, Victoria E. Young<sup>1</sup>, Martin J. Graves<sup>1</sup>, Jonathan H. Gillard<sup>1</sup>

**1** University Department of Radiology, University of Cambridge, Cambridge, United Kingdom, **2** Department of Engineering, University of Cambridge, Cambridge, United Kingdom, **3** Department of Surgery, Cambridge University Hospitals NHS Foundation Trust, Cambridge, United Kingdom, **4** College of Computer Science and Technology, Zhejiang University of Technology, Hangzhou, China

## Abstract

**Background:** Stretch is a mechanical parameter, which has been proposed previously to affect the biological activities in different tissues. This study explored its utility in determining plaque vulnerability.

**Methods:** One hundred and six patients with mild to moderate carotid stenosis were recruited in this study (53 symptomatic and 53 asymptomatic). High resolution, multi-sequence magnetic resonance (MR) imaging was performed to delineate various plaque components. Finite element method was used to predict high stretch concentration within the plaque.

**Results:** During a two-year follow-up, 11 patients in symptomatic group and 3 in asymptomatic group experienced recurrent cerebrovascular events. Plaque stretch at systole and stretch variation during one cardiac cycle was greater in symptomatic group than those in the asymptomatic. Within the symptomatic group, a similar trend was observed in patients with recurrent events compared to those without.

**Conclusion:** Plaques with high stretch concentration and large stretch variation are associated with increased risk of future cerebrovascular events.

**Citation:** Teng Z, Sadat U, Wang W, Bahaei NS, Chen S, et al. (2013) Intraplaque Stretch in Carotid Atherosclerotic Plaque – an Effective Biomechanical Predictor for Subsequent Cerebrovascular Ischemic Events. PLoS ONE 8(4): e61522. doi:10.1371/journal.pone.0061522

**Editor:** Jean-Claude Baron, University of Cambridge, United Kingdom

**Received:** December 5, 2012; **Accepted:** March 11, 2013; **Published:** April 23, 2013

**Copyright:** © 2013 Teng et al. This is an open-access article distributed under the terms of the Creative Commons Attribution License, which permits unrestricted use, distribution, and reproduction in any medium, provided the original author and source are credited.

**Funding:** This research is supported by ARTreat European Union FP7, BHF PG/11/74/29100 and the NIHR Cambridge Biomedical Research Centre. Mr. Wang is supported by Cambridge-CSC (China Scholarship Council) International Scholarship. The funders had no role in study design, data collection and analysis, decision to publish, or preparation of the manuscript.

**Competing Interests:** The authors have declared that no competing interests exist.

\* E-mail: zt215@cam.ac.uk

These authors contributed equally to this work.

## Introduction

During the last decade we have witnessed a revolution in the imaging-based assessment of atheromatous plaques. Magnetic resonance (MR) imaging has emerged as a non-invasive, non-ionizing imaging technique, which has potential to identify and differentiate between vulnerable and non-vulnerable plaques [1]. While most studies initially used MR for morphological and functional assessment of plaques, there has been a continued effort towards MR-based biomechanical investigation of the diseased vessel [2] because plaque rupture likely occurs if mechanical loading within the fibrous cap (FC) due to blood pressure and flow exceeds its material strength. The superiority of patient-specific biomechanics originates from its inherent capability to integrate information of plaque architecture and associated mechanical conditions. In the only longitudinal study of its kind, we have previously reported that high structural stresses are associated with subsequent cerebrovascular ischemic events [3]. Higher predictive

power of biomechanical modelling, compared to morphology alone, was evident from this study. Quantification of structural stresses, however, requires complex computational modelling. A directly measurable biomechanical predictor would, therefore, be a desirable substitute for daily clinical practice. Plaque stretch has shown promise in preliminary studies [4,5,6,7,8]. With this perspective, here we explore the relationship of plaque stretch, determined by MR-based patient-specific computational modelling, with subsequent cerebrovascular ischaemic events.

## Materials and Methods

One hundred and six patients were recruited in this study with fifty-three subjects being acutely symptomatic (i.e. had undergone MR imaging within 72 hours of the acute event) and 53 being asymptomatic (i.e. had never had any events or were asymptomatic over 6 months before undergoing MR imaging). These patients were clinically followed up for 2 years. The protocol was

reviewed and approved by the regional research ethics committee (Addenbrooke’s Hospital Ethics Committee) and all patients gave written informed consent. The criteria for inclusion were: (1) internal carotid artery (ICA) stenosis of  $\geq 30\text{--}69\%$  on duplex imaging during screening assessment; (2) the quality of MR image was rated by using a previously published five-point scale based on noise-to-signal ratio [9,10] and image quality  $\geq 4$  were included for quantitative analysis; and (3) normal heart rhythm, confirmed by 24 hour Holter monitoring and normal transthoracic echocardiography in patients where a cause of stroke other than carotid artery disease was suspected. Exclusion criteria included: (1) cardiac arrhythmias; (2) known coagulation/clotting disorder responsible for patient’s symptoms; (3) patients undergoing thrombolysis following the acute cerebrovascular event; and (4) clinical contraindications to MR, e.g. inner ear implants, pacemaker, etc. The clinical end point of the study was a cerebrovascular event including stroke or transient ischaemic attack (TIA) in the region supplied by the index carotid artery, or operation on the index artery. The date of the clinical event was ascertained by review of hospital records and confirmed by patient interviews. Following the event, it was ensured that patients were on the best medical therapy i.e. anti-platelets, cholesterol lowering and antihypertensive medications (if required). The patient demographics are shown in Table 1. Based on previous published protocol [11], multi-contrast weighted images were performed (the 1<sup>st</sup> row in Fig. 1). Plaque components such as FC, lipid-rich necrotic core (LRNC) and plaque haemorrhage (PH) were manually delineated using CMRTTools (London, UK). In total, ten patients in the symptomatic group were excluded for analysis due to various reasons, such as poor image quality and claustrophobia.

**Finite Element Analysis**

The plaque geometry reconstruction was based on the MR segmentation. The rupture FC was recovered using cubic spline function. Under physiological condition, the artery is pressurized, thus circumferential shrinking was applied to generate the start

shape for the computational simulation [12]. The plaque components were assumed to be incompressible, piecewise homogeneous, non-linear isotropic and hyper-elastic as described by modified Mooney-Rivlin strain energy density function:

$$W = c_1(I_1 - 3) + D_1[\exp(D_2(I_2 - 3)) - 1]$$

where  $I_1$  is the first stretch invariant and  $c_1$ ,  $D_1$  and  $D_2$  are material parameters derived from previous experimental work [13,14,15,16]: vessel material,  $c_1 = 36.8$  kPa,  $D_1 = 14.4$  kPa,  $D_2 = 2$ ; fibrous cap,  $c_1 = 73.6$  kPa,  $D_1 = 28.8$  kPa,  $D_2 = 2.5$ ; lipid core,  $c_1 = 2$  kPa,  $D_1 = 2$  kPa,  $D_2 = 1.5$ ; calcification,  $c_1 = 368$  kPa,  $D_1 = 144$  kPa,  $D_2 = 2.0$ .  $c_2 = 0$  for all materials. Rubin et al have performed numerous experiments on determining the relative model-based Young’s elastic modulus of thrombi of varying ages using animal models and in humans [15,17,18,19]. Therefore, the material properties of PH were derived from these experiments. For the fresh PH the following parameters were used:  $c_1 = 1$  kPa,  $D_1 = 1$  kPa,  $D_2 = 0.25$ . As Rubin et al had categorized thrombi of  $>1$  week age as ‘chronic’, so for MR-identified recent and old PH plaques, the parameters were used:  $c_1 = 9$  kPa,  $D_1 = 9$  kPa,  $D_2 = 0.25$ . The stretch of each atherosclerotic component is governed by kinetic equations as:

$$\rho v_{i,t} = \sigma_{ij,j} (i,j = 1,2)$$

where  $[v_i]$  and  $[\sigma_{ij}]$  are the displacement vector and stress tensor, respectively,  $\rho$  is the density of each component and  $t$  stands for time. The pulsatile blood pressure for each patient was measured before MR imaging using tonometry [20,21] and it was used as the loading condition for the dynamic simulation.

The entire geometric model was meshed using 9-node quadrilaterals and both displacement and strain were assumed to be large. There was no relative movement at the interface of atherosclerotic components. The relative energy tolerance was set to be 0.005. The loading at the outer boundary was set to be zero

**Table 1. Patient demography.**

|                                        | Symptomatic (n = 43) | Asymptomatic (n = 53) | p value |
|----------------------------------------|----------------------|-----------------------|---------|
| Male, n(%)                             | 25 (78.1)            | 36 (67.9)             | 0.400*  |
| Age (Mean±SD)                          | 73.7±11.2            | 69.7±11.1             | 0.051‡  |
| Diastolic pressure (Mean±SD; mmHg)     | 79.9±13.1            | 77.8±14.7             | 0.349‡  |
| Systolic pressure (Mean±SD; mmHg)      | 142.3±23.6           | 138.9±21.1            | 0.309‡  |
| Heart Rate (Median[IQR])               | 78 [69, 82]          | 76 [70, 81]           | 0.072†  |
| Hypertension, n(%)                     | 33 (76.7)            | 42 (79.2)             | 0.808*  |
| Diabetes, n(%)                         | 4 (9.3)              | 7 (13.2)              | 0.749*  |
| Atrial fibrillation                    | 7 (16.3)             | 5 (9.4)               | 0.363*  |
| Ischaemic heart disease, n(%)          | 17 (39.5)            | 19 (35.8)             | 0.833*  |
| Peripheral vascular disease, n(%)      | 5 (11.6)             | 8 (15.1)              | 0.767   |
| Previous TIA/Stroke, n(%)              | 10 (23.3)            | 27 (50.9)             | 0.007*  |
| Aspirin used before recruitment, n (%) | 18 (41.9)            | 37 (69.8)             | 0.007*  |
| Stenosis %, (Median[IQR]) §            | 49 [42, 54]          | 50 [43, 59]           | 0.464†  |
| Days of follow-up, (Median[IQR])       | 428 [94, 689]        | 659 [385, 830]        | 0.002†  |

\*Two-sided p value using Fisher’s exact test.  
 ‡Two-tailed p value using Student t test.  
 †Two-tailed p value using Mann-Whitney test.  
 §ECST defined stenosis.

doi:10.1371/journal.pone.0061522.t001

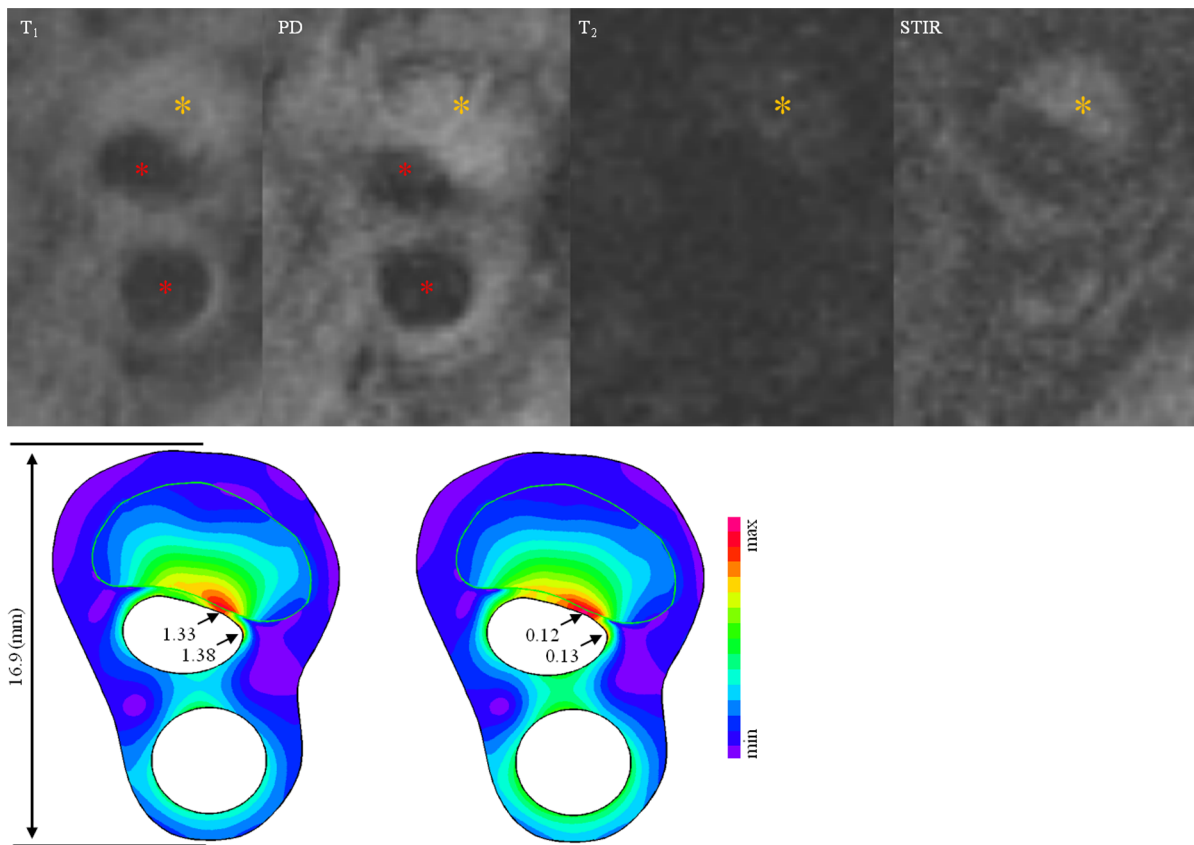

**Figure 1. In vivo MR images and band plot of computational results [The 1<sup>st</sup> row: Signal intensity of a plaque near the carotid bifurcation under T<sub>1</sub>, PD, T<sub>2</sub> and STIR MR sequences (red asterisks stand for lumen and the brown for fresh intraplaque haemorrhage); the 2<sup>nd</sup> row, the left image is the band plot of Stretch-P<sub>1</sub> at systole and the right one is the variation of Stretch-P<sub>1</sub> during one cardiac cycle].**

doi:10.1371/journal.pone.0061522.g001

and two adjacent points were fixed to prevent rigid body displacement. Maximum principle stretch (Stretch-P<sub>1</sub>) was computed using finite element method in ADINA8.6.1 (ADINA R&D, Inc., USA). Stretch-P<sub>1</sub> can be understood as the ratio of the deformed length and the original. Stretch-P<sub>1</sub> within the plaque was assessed as well as its variation during one cardiac cycle (the 2<sup>nd</sup> row in Fig. 1). The stretch variation is defined as,

$$\begin{aligned} & \text{Variation of Stretch} - P_1 i \\ & = \max(\text{Stretch} - P_1 i^t) - \min(\text{Stretch} - P_1 i^t) \end{aligned}$$

in which the subscript *i* stands for the *i*<sup>th</sup> integration node and the superscript *t* stands for time.

Researchers that carried out the mechanical analysis were blinded to the process of image segmentation and the information of patient symptom to avoid subjective bias.

### Statistical Analysis

Normal distribution was tested by Shapiro-Wilk test. For non-normal data, two-tailed Mann-Whitney test and for normal data two-tailed student t test were used. Usually about 8–12 MR slices were taken for each plaque that led to multiple mechanical measurements for a single plaque. The linear mixed effect model was, therefore, used to assess and compare the stretch concentration in different patient groups. This statistical model considered both random effect from slices of an individual plaque and fix

effect of different symptom group. Categorical variables were analysed using two-sided Fisher’s exact test. Statistical analysis was performed in R 2.10.1 (The R Foundation for Statistical Computing). Statistical threshold was set as p value < 0.05.

### Results

In total, 709 slices from 96 patients were analysed and the number of elements and nodes of each slice were 3,029 [2,239, 5,069] and 12,516 [9,354, 20,676] (Median [inter quartile range]), respectively. During the follow-up, 11 (25.6%) patients in the symptomatic group and 3 (5.7%) in the asymptomatic experienced ischaemic cerebrovascular events (p = 0.008). The symptomatic group is further divided into non-recurrent (did not experience ischaemic cerebrovascular events during the follow-up period) and recurrent subgroups (experienced ischaemic cerebrovascular events during the follow-up period). Considering the low incidence in the asymptomatic group, similar analysis is not performed.

### Morphological and Compositional Features

FC rupture and PH had a higher prevalence in symptomatic group than asymptomatic group (FC rupture: 67.4% vs. 22.6%, p < 0.001; PH: 62.8% vs. 41.5%, p = 0.043), while there was no significant difference regarding large LRNC (30.2% vs. 50.9%, p = 0.061). Within the symptomatic group, PH was less prevalent in non-recurrent than in recurrent group (53.1% vs. 90.9%, p = 0.033), but FC rupture and large lipid core were both

**Table 2.** Plaque compositional and morphological features.

|                               | Asymptomatic (n = 53) | No-Recurrent (n = 32) | Recurrent (n = 11) |
|-------------------------------|-----------------------|-----------------------|--------------------|
| Fibrous cap rupture, n(%)     | 12 (22.6)             | 19 (59.4)             | 10 (90.9)          |
| Presence of haemorrhage, n(%) | 22 (41.5)             | 17 (53.1)             | 10 (90.9)          |
| Large lipid core, n(%)*       | 27 (50.9)             | 9 (28.1)              | 4 (36.4)           |

\*Lipid area  $\geq$ 25% plaque area.  
doi:10.1371/journal.pone.0061522.t002

comparable between these two subgroups (FC rupture: 59.4% vs. 90.9%,  $p = 0.071$ ; large lipid core: 28.1% vs. 36.4%,  $p = 0.709$ ). These features in detail are listed in Table 2.

### High Risk Nature of High Stretch Concentration

As shown in Fig. 2A, the stretch levels at both diastole and systole in the asymptomatic group were significantly lower than those in the symptomatic group (median [inter quartile range]; Diastole: 1.145 [1.101, 1.204] vs. 1.209 [1.137, 1.303],  $p = 0.001$ ; Systole: 1.200 [1.144, 1.267] vs. 1.286 [1.186, 1.386],  $p < 0.001$ ). Variation of blood pressure during each cardiac cycle leads to significant changes in the stretch within the carotid atherosclerotic plaque. Fig. 2B demonstrates the difference of stretch variation during one cardiac cycle between asymptomatic and symptomatic patients (0.071 [0.046, 0.093] vs. 0.051 [0.034, 0.068],  $p < 0.001$ ).

More interestingly, as shown in Fig. 2C, within symptomatic patient group, plaques responsible for recurrent events underwent a much bigger stretch at both diastole and systole compared with those remained stable during the follow-up period (Diastole: 1.275 [1.211, 1.400] vs. 1.177 [1.114, 1.253],  $p = 0.013$ ; Systole: 1.363 [1.269, 1.475] vs. 1.246 [1.164, 1.342],  $p = 0.012$ ). Similarly, as shown in Fig. 2D, during one cardiac cycle, the variation of Stretch- $P_1$  of unstable lesions was much bigger than the stable ones (0.078 [0.061, 0.095] vs. 0.066 [0.040, 0.091],  $p = 0.041$ ).

### Proportional Hazard Ratio Analysis of Symptomatic Patients

The hazard ratios (HR) of patient demographics, co-morbidities, plaque disease characteristics and critical stretch conditions in the symptomatic group were listed in Table 3. Both FC rupture (HR = 6.02,  $p = 0.031$ ) and presence of haemorrhage (HR = 8.00,  $p = 0.010$ ) were confirmed to be high-risk features associated with recurrent ischaemic cerebrovascular events. The absolute values of Stretch- $P_1$  at both diastolic (HR = 9.08,  $p = 0.025$ ) and systolic (HR = 7.56,  $p = 0.021$ ) appeared to be risk factors for the recurrent events, as is the variation of Stretch- $P_1$  (HR = 31.08,  $p = 0.045$ ) during a single heartbeat.

### Discussion

To authors' best knowledge, this is the first study assessing the clinical significance of plaque stretch by tracing patient symptoms. It showed that carotid atherosclerotic plaques in symptomatic patients undergo more profound plaque stretch and stretch variation compared to those in asymptomatic patients. It also showed that this observation was more prevalent in plaques responsible for recurrent ischaemic cerebrovascular events than stable lesions. The median value (0.078) of Stretch- $P_1$  variation in recurrent group implied that the change of stretch ratio could be up to 8% in some areas in the plaque during one heartbeat. Further analysis indicated that the area with stretch variation

above this level could be as big as  $4.20 \pm 3.98 \text{ mm}^2$  in the recurrent subgroup.

In this study, most (87.5%) of peak stretch were located within LRNC and PH and only 12.5% of peak stretch were located in FC along lumen region. Understanding the pathological impact of big stretch within the plaque structure would provide support for its applications. Many studies have shown pathological responses on cellular and genetic levels to local stretch within plaques.

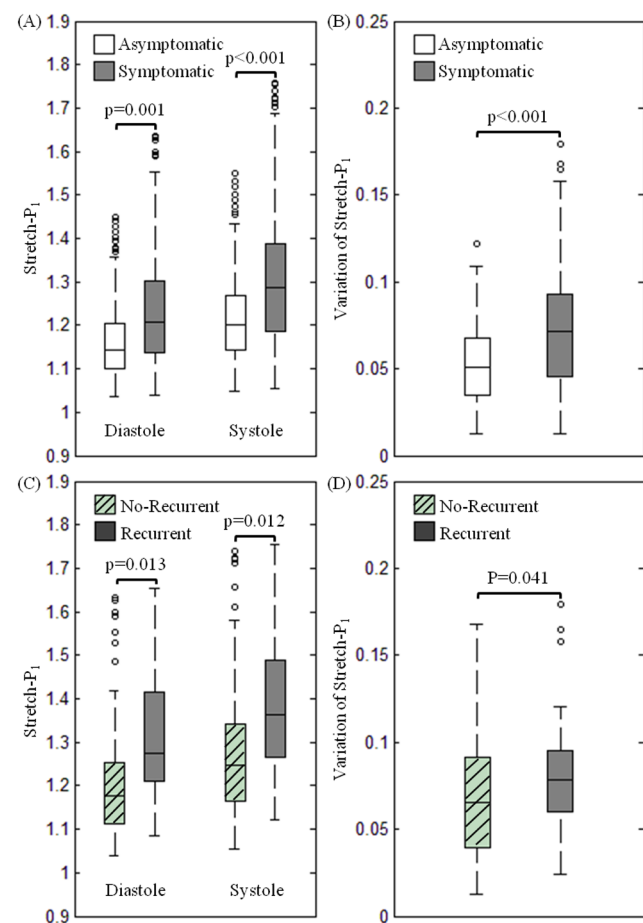

**Figure 2.** The comparison of plaque stretch (Stretch- $P_1$ ) and its variation in different patient groups (A: Stretch- $P_1$  at diastole and systole of asymptomatic and symptomatic patients; B: the variation of Stretch- $P_1$  during one cardiac cycle of asymptomatic and symptomatic patients; C: Stretch- $P_1$  at diastole and systole of patients in subgroups of with and without experiencing recurrent ischaemic cerebrovascular events; D: the variation of Stretch- $P_1$  during one cardiac cycle of patients in these two subgroups).  
doi:10.1371/journal.pone.0061522.g002

**Table 3.** Univariate Cox regression analysis of patient demographics, co-morbidities, carotid artery disease characteristics and critical mechanical conditions in the symptomatic group.

|                                     | Hazard ratio | 95% Confident interval | p value |
|-------------------------------------|--------------|------------------------|---------|
| Age                                 | 0.98         | [0.94, 1.01]           | 0.296   |
| Hypertension                        | 1.76         | [0.37, 8.35]           | 0.474   |
| Diabetes mellitus                   | 0.60         | [0.13, 2.60]           | 0.500   |
| Peripheral vascular disease         | 0.66         | [0.08, 5.24]           | 0.696   |
| Coronary artery disease             | 1.42         | [0.18, 11.41]          | 0.739   |
| ECST defined luminal stenosis       | 1.00         | [0.93, 1.06]           | 0.886   |
| Large lipid core                    | 1.50         | [0.44, 5.17]           | 0.529   |
| Fibrous cap rupture                 | 6.02         | [0.77, 47.31]          | 0.031*  |
| Haemorrhage                         | 8.00         | [1.02, 62.86]          | 0.010*  |
| Stretch-P <sub>1</sub> at diastole  | 9.08         | [1.32, 62.31]          | 0.025*  |
| Stretch-P <sub>1</sub> at systole   | 7.65         | [1.35, 43.32]          | 0.021*  |
| Variation of Stretch-P <sub>1</sub> | 31.08        | [4.01, 965.11]         | 0.045*  |

doi:10.1371/journal.pone.0061522.t003

Pathological stretch can dysregulate cytoskeletal gene expression [22], affecting cell attachment and encouraging programmed cell death [23] and therefore preventing healing in the carotid plaque following acute events [24]. Elevated intraplaque stretch level could lead to smooth muscle cell hypertrophy/hyperplasia by increasing inositol phosphate metabolism and proto-oncogenes expression [25,26] and possibly promote plaque progression. Moreover, big intraplaque stretch might lead to the rupture of neovessels resulting in the formation and expansion of intraplaque hemorrhage, thereby increasing plaque vulnerability [27].

With this relevance, increasing attentions have been attracted by plaque stretch to assess its clinical significance. It has been shown that the maximum discrepant surface velocity, defined as the maximum of differences between maximum and minimum

surface velocities, in symptomatic plaque was significantly higher than that of asymptomatic plaque [28], and mobile plaque (bigger movement during a cardiac cycle) is associated with increased risk of ischaemic stroke [29]. It was found that ‘complex’ plaques follows a specific pattern of reduced radial strain along the longitudinal direction that associated with an outer remodeling, which might be a feature of high-risk plaques [30]. Symptomatic plaques presented both FC defect (erosion, rupture and ulceration) and haemorrhage could be in an extremely high risk due to big stretch concentrations around the ruptured region [24]. It is worth to point out that the ‘stretch’ mentioned in different studies may mean different mechanical determinant, including rigid body displacement, radial strain, maximum principal stretch, etc.

As been reported, stress is an important mechanical parameter, which can be used to assess plaque vulnerability [3,31,32,33,34,35,36,37]. However, obtained results in this study suggest that stress and stretch might need to be both considered since under most of situation they are located at different locations and they may have different pathological impact. It needs to be pointed out that to obtain the stress distribution within the plaque, apart from the anatomical information, the material properties of each plaque component are required. These material properties however, are not measurable using the current non-invasive techniques. Moreover, it also requires specialised finite element analysis to achieve the distribution of stress. Comparatively, stretch can be potentially measured by image-based ultrasound elastography [4,5,6,7,8] with more convenience in clinical practice. However, the radio frequency data can only reflect the displacement along the ultrasound beam. Therefore, the strain image produced by current ultrasound elastography is a radial strain map limited the direction of ultrasound beam. Further studies are needed to explore the possibility of measuring the maximum principal stretch using ultrasound radio frequency.

This study also provides an insight into underlying mechanism of current medical therapies, such as anti-hypertension. Reduction in systolic blood pressure will decrease the stretch level at systole and its variation by narrowing the pulse pressure. The correlation between the Stretch-P<sub>1</sub> at systole and the systolic blood pressure, however was very weak (correlation coefficient, R<sup>2</sup> = 0.03), as shown in Fig. 3A. Ten percent reduction in systolic blood pressure

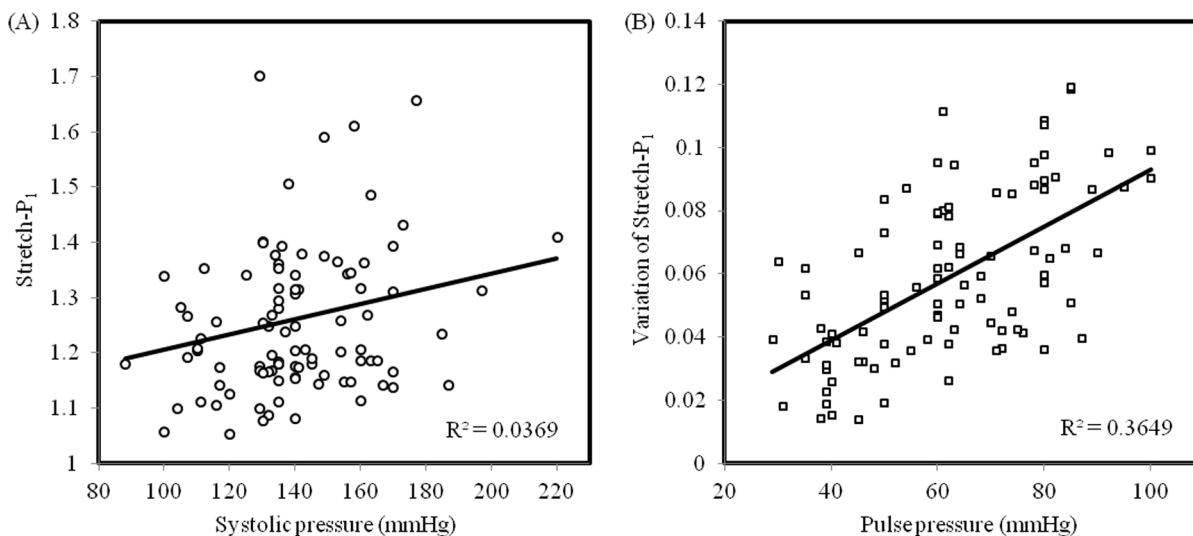

**Figure 3.** The correlation between Stretch-P<sub>1</sub> and its variation during one cardiac cycle with systolic blood pressure (A) and pulse pressure (B), respectively.

doi:10.1371/journal.pone.0061522.g003

only led to  $1.97 \pm 0.81\%$  decrease in the Stretch- $P_1$  at systole, but it would reduce the stretch variation by  $24.57 \pm 5.90\%$ . A strong correlation between the stretch variation and the pulse pressure was observed (Fig. 3B;  $R^2 = 0.365$ ).

Despite the interesting findings reported in this study, several limitations exist: (1) Limited by the MR resolution (in-plane resolution:  $0.39 \times 0.39 \text{ mm}^2$ ), the FC thickness and size of atherosclerotic component might be over-/under-estimated. This issue had been aware by some of authors involved in this study [38,39]. Inter-observers studies were performed and the uncertainties among inter observers are around one or the subpixel level [38]; (2) Most biological soft tissues, including healthy arterial wall and fibrous cap, are fibre oriented. The pattern of fibre orientation in healthy arterial wall is clear [40]. Although the material properties of atherosclerotic tissues are layer- and direction-dependent [41,42], however, the distribution and orientation of collagen and elastin in atherosclerotic tissues are less clear and have been least investigated. Moreover, this information cannot be quantified by current MR technology. The anisotropy, therefore, was not considered in this study; (3) Patient-specific material constants of each atherosclerotic component were not used in this study as they were not measurable using current non-invasive approaches. However, stresses and strains within the arterial wall, fibrous plaque, calcified plaque and lipid have low sensitivities for

variation in the elastic modulus [43]. Even a  $\pm 50\%$  variation in elastic modulus leads to less than a 10% change in stress at the site of rupture; and (4) Due to the short  $T_2$ , calcium is hard to be detected by traditional 2D Turbo MR sequences [44,45]. Therefore, in this study, the calcium content could be underestimated.

## Conclusion

In this study we have quantified the plaque stretch and highlighted the association between the degree of stretch and its variation during one cardiac cycle with subsequent ischaemic cerebrovascular event in symptomatic patients.

## Acknowledgments

Authors sincerely appreciated the help from Mr Richard A. Parker, Centre for Applied Medical Statistics, University of Cambridge, for his professional advice in performing statistical analysis in this study.

## Author Contributions

Conceived and designed the experiments: ZT US JHG. Performed the experiments: US VY. Analyzed the data: ZT WW NSB SC. Contributed reagents/materials/analysis tools: MJG. Wrote the paper: ZT US JHG.

## References

- Corti R, Fuster V (2011) Imaging of atherosclerosis: magnetic resonance imaging. *Eur Heart J* 32: 1709–1719b.
- Sadat U, Teng Z, Gillard JH (2010) Biomechanical structural stresses of atherosclerotic plaques. *Expert Rev Cardiovasc Ther* 8: 1469–1481.
- Sadat U, Teng Z, Young VE, Walsh SR, Li ZY, et al. (2010) Association between biomechanical structural stresses and morphological characteristics of atherosclerotic carotid plaques and subsequent ischaemic cerebrovascular events- a longitudinal in vivo MRI-based finite-element study. *Eur J Vasc Endovasc Surg* 40: 485–491.
- Zhang PF, Su HJ, Zhang M, Li JF, Liu CX, et al. (2010) Atherosclerotic plaque components characterization and macrophage infiltration identification by intravascular ultrasound elastography based on b-mode analysis: validation in vivo. *Int J Cardiovasc Imaging* 27: 39–49.
- de Korte CL, Siervogel MJ, Mastik F, Strijder C, Schaar JA, et al. (2002) Identification of atherosclerotic plaque components with intravascular ultrasound elastography in vivo: a Yucatan pig study. *Circulation* 105: 1627–1630.
- Shi H, Mitchell CC, McCormick M, Kliever MA, Dempsey RJ, et al. (2008) Preliminary in vivo atherosclerotic carotid plaque characterization using the accumulated axial strain and relative lateral shift strain indices. *Phys Med Biol* 53: 6377–6394.
- Zhang L, Liu Y, Zhang PF, Zhao YX, Ji XP, et al. (2010) Peak radial and circumferential strain measured by velocity vector imaging is a novel index for detecting vulnerable plaques in a rabbit model of atherosclerosis. *Atherosclerosis* 211: 146–152.
- Hu XB, Zhang PF, Su HJ, Yi X, Chen L, et al. (2011) Intravascular ultrasound area strain imaging used to characterize tissue components and assess vulnerability of atherosclerotic plaques in a rabbit model. *Ultrasound Med Biol* 37: 1579–1587.
- Yuan C, Mitsumori LM, Ferguson MS, Polissar NL, Echelard D, et al. (2001) In vivo accuracy of multispectral magnetic resonance imaging for identifying lipid-rich necrotic cores and intraplaque hemorrhage in advanced human carotid plaques. *Circulation* 104: 2051–2056.
- Mitsumori LM, Hatsukami TS, Ferguson MS, Kerwin WS, Cai J, et al. (2003) In vivo accuracy of multisequence MR imaging for identifying unstable fibrous caps in advanced human carotid plaques. *J Magn Reson Imaging* 17: 410–420.
- Sadat U, Weerakkody RA, Bowden DJ, Young VE, Graves MJ, et al. (2009) Utility of high resolution MR imaging to assess carotid plaque morphology: A comparison of acute symptomatic, recently symptomatic and asymptomatic patients with carotid artery disease. *Atherosclerosis*: 434–439.
- Huang Y, Teng Z, Sadat U, Hillborne S, Young VE, et al. (2011) Non-uniform shrinkage for obtaining computational start shape for in-vivo MRI-based plaque vulnerability assessment. *J Biomech* 44: 2316–2319.
- Humphery JD (2002) *Cardiovascular Solid Mechanics*. New York: Springer-Verlag.
- Kobayashi S, Tsunoda D, Fukuzawa Y, Morikawa H, Tang D, et al. Flow and compression in arterial models of stenosis with lipid core; 2003; Miami, FL, USA. pp. 497–498.
- Xie H, Kim K, Aglyamov SR, Emelianov SY, O'Donnell M, et al. (2005) Correspondence of ultrasound elasticity imaging to direct mechanical measurement in aging DVT in rats. *Ultrasound Med Biol* 31: 1351–1359.
- Sadat U, Teng Z, Young VE, Zhu C, Tang TY, et al. (2011) Impact of plaque haemorrhage and its age on structural stresses in atherosclerotic plaques of patients with carotid artery disease: an MR imaging-based finite element simulation study. *Int J Cardiovasc Imaging* 27: 397–402.
- Xie H, Kim K, Aglyamov SR, Emelianov SY, Chen X, et al. (2004) Staging deep venous thrombosis using ultrasound elasticity imaging: animal model. *Ultrasound Med Biol* 30: 1385–1396.
- Rubin JM, Xie H, Kim K, Weitzel WF, Emelianov SY, et al. (2006) Sonographic elasticity imaging of acute and chronic deep venous thrombosis in humans. *J Ultrasound Med* 25: 1179–1186.
- Rubin JM, Aglyamov SR, Wakefield TW, O'Donnell M, Emelianov SY (2003) Clinical application of sonographic elasticity imaging for aging of deep venous thrombosis: preliminary findings. *J Ultrasound Med* 22: 443–448.
- Mackay RS, Marg E, Oechsli R (1960) Automatic tonometer with exact theory: various biological applications. *Science* 131: 1668–1669.
- Drzewiecki GM, Melbin J, Noordergraaf A. Deformational forces in arterial tonometry; 1984; New York. IEEE. pp. 642–645.
- D'Addario M, Arora PD, Ellen RP, McCulloch CA (2002) Interaction of p38 and Sp1 in a mechanical force-induced, beta 1 integrin-mediated transcriptional circuit that regulates the actin-binding protein filamin-A. *J Biol Chem* 277: 47541–47550.
- Kainulainen T, Pender A, D'Addario M, Feng Y, Lekic P, et al. (2002) Cell death and mechanoprotection by filamin A in connective tissues after challenge by applied tensile forces. *J Biol Chem* 277: 21998–22009.
- Teng Z, Sadat U, Huang Y, Young VE, Graves MJ, et al. (2011) In vivo MRI-based 3D mechanical stress-strain profiles of carotid plaques with juxtaluminal plaque haemorrhage: an exploratory study for the mechanism of subsequent cerebrovascular events. *Eur J Vasc Endovasc Surg* 42: 427–433.
- Izzard AS, MacIver DH, Cragoe EJ, Heagerty AM (1991) Intracellular pH in rat resistance arteries during the development of experimental hypertension. *Clin Sci (Lond)* 81: 65–72.
- MacIver DH, Green NK, Gammage MD, Durkin H, Izzard AS, et al. (1993) Effect of experimental hypertension on phosphoinositide hydrolysis and proto-oncogene expression in cardiovascular tissues. *J Vasc Res* 30: 13–22.
- Teng Z, He J, Degnan AJ, Chen S, Sadat U, et al. (2012) Critical mechanical conditions around neovessels in carotid atherosclerotic plaque may promote intraplaque hemorrhage. *Atherosclerosis* 223: 321–326.
- Meairs S, Hennerici M (1999) Four-dimensional ultrasonographic characterization of plaque surface motion in patients with symptomatic and asymptomatic carotid artery stenosis. *Stroke* 30: 1807–1813.
- Kume S, Hama S, Yamane K, Wada S, Nishida T, et al. (2010) Vulnerable carotid arterial plaque causing repeated ischemic stroke can be detected with B-mode ultrasonography as a mobile component: Jellyfish sign. *Neurosurg Rev* 33: 419–430.
- Beaussier H, Naggara O, Calvet D, Joannides R, Guegan-Massardier E, et al. (2011) Mechanical and structural characteristics of carotid plaques by combined

- analysis with echotracking system and MR imaging. *JACC Cardiovasc Imaging* 4: 468–477.
31. Li ZY, Howarth S, Trivedi, R A., U. King-Im JM., Graves, M J., Brown A., Wang L., Gillard, J H. (2005) Stress analysis of carotid plaque rupture based on in vivo high resolution MRI. *J Biomech*: 2611–2622.
  32. Sadat U, Li ZY, Young VE, Graves MJ, Boyle JR, et al. (2009) Finite element analysis of vulnerable atherosclerotic plaques: A comparison of mechanical stresses within carotid plaques of acute and recently symptomatic patients with carotid artery disease. *J Neurol Neurosurg Psychiatry*: 286–289.
  33. Sadat U, Teng Z, Young VE, Graves MJ, Gaunt ME, et al. (2011) High-resolution Magnetic Resonance Imaging-based Biomechanical Stress Analysis of Carotid Atheroma: A Comparison of Single Transient Ischaemic Attack, Recurrent Transient Ischaemic Attacks, Non-disabling Stroke and Asymptomatic Patient Groups. *Eur J Vasc Endovasc Surg* 41: 83–90.
  34. Teng Z, Canton G, Yuan C, Ferguson M, Yang C, et al. (2010) 3D critical plaque wall stress is a better predictor of carotid plaque rupture sites than flow shear stress: An in vivo MRI-based 3D FSI study. *J Biomech Eng* 132: 031007.
  35. Tang D, Yang C, Zheng J, Woodard PK, Sicard GA, et al. (2004) 3D MRI-based multicomponent FSI models for atherosclerotic plaques. *Ann Biomed Eng* 32: 947–960.
  36. Gao H, Long Q, Kumar Das S, Halls J, Graves M, et al. (2011) Study of carotid arterial plaque stress for symptomatic and asymptomatic patients. *J Biomech* 44: 2551–2557.
  37. Gao H, Long Q, Das SK, Sadat U, Graves M, et al. (2011) Stress analysis of carotid atheroma in transient ischemic attack patients: evidence for extreme stress-induced plaque rupture. *Ann Biomed Eng* 39: 2203–2212.
  38. Gao H, Long Q, Graves M, Gillard JH, Li ZY (2009) Study of reproducibility of human arterial plaque reconstruction and its effects on stress analysis based on multispectral in vivo magnetic resonance imaging. *J Magn Reson Imaging* 30: 85–93.
  39. Sadat U, Weerakkody RA, Bowden DJ, Young VE, Graves MJ, et al. (2009) Utility of high resolution MR imaging to assess carotid plaque morphology: a comparison of acute symptomatic, recently symptomatic and asymptomatic patients with carotid artery disease. *Atherosclerosis* 207: 434–439.
  40. Gasser TC, Ogden RW, Holzapfel GA (2006) Hyperelastic modelling of arterial layers with distributed collagen fibre orientations. *J R Soc Interface* 3: 15–35.
  41. Holzapfel GA, Sommer G, Regitnig P (2004) Anisotropic mechanical properties of tissue components in human atherosclerotic plaques. *J Biomech Eng* 126: 657–665.
  42. Teng Z, Tang D, Zheng J, Woodard PK, Hoffman AH (2009) An experimental study on the ultimate strength of the adventitia and media of human atherosclerotic carotid arteries in circumferential and axial directions. *J Biomech* 42: 2535–2539.
  43. Williamson SD, Lam Y, Younis HF, Huang H, Patel S, et al. (2003) On the sensitivity of wall stresses in diseased arteries to variable material properties. *J Biomech Eng* 125: 147–155.
  44. Du J, Corbeil J, Znamirovski R, Angle N, Peterson M, et al. (2011) Direct imaging and quantification of carotid plaque calcification. *Magn Reson Med* 65: 1013–1020.
  45. Koktzoglou I (2012) Gray blood magnetic resonance for carotid wall imaging and visualization of deep-seated and superficial vascular calcifications. *Magn Reson Med*.
